# Supplementary material
Source: PubMed Central journal article supplement (PMC7653538)
Supplement: jamapediatr-e204719-s001.pdf [file jamapediatr-e204719-s001.pdf]

## Supplementary Online Content

Flannery DD, Akinboyo IC, Mukhopadhyay S, et al. Antibiotic susceptibility of *Escherichia coli* among infants admitted to neonatal intensive care units across the US from 2009 to 2017. *JAMA Pediatr*. Published online November 9, 2020. doi:10.1001/jamapediatrics.2020.4719

**eTable 1.** Distribution of Positive *Escherichia coli* Culture Combinations by First Episode

**eTable 2.** Nonsusceptibility Counts and Rates Over Time by Patient Category and Antibiotic Category

**eTable 3.** Estimated Yearly Change in by Patient Category and Antibiotic Category

**eTable 4.** Multivariable Regression of Isolate Antibiotic Susceptibility Profile and In-Hospital Mortality

**eFigure.** Neonatal *Escherichia coli* Nonsusceptibility Trends Over Time by Specimen Source, Birth Weight Category, and Timing of Infection

This supplementary material has been provided by the authors to give readers additional information about their work.

eTable 1: Distribution of Positive *Escherichia coli* Culture Combinations by First Episode

| First positive culture combination (n, %) | Overall    | EOS        | LOS        |
|-------------------------------------------|------------|------------|------------|
| Blood culture                             | 358 (49.7) | 212 (96.4) | 146 (29.1) |
| CSF culture                               | 6 (0.8)    | 3 (1.4)    | 3 (0.6)    |
| Urine culture                             | 322 (44.7) | 2 (0.9)    | 320 (63.9) |
| Blood + CSF cultures                      | 10 (1.4)   | 3 (1.4)    | 7 (1.4)    |
| Blood + urine cultures                    | 24 (3.3)   | 0 (0)      | 24 (4.8)   |
| Blood + CSF + urine cultures              | 1 (0.1)    | 0 (0)      | 1 (0.2)    |
| Total                                     | 721        | 220        | 501        |

Footnotes: Not all infants had all three culture types performed. Decimals may not add up to 100 due to rounding. CSF (cerebrospinal fluid); EOS (early onset sepsis); LOS (late onset sepsis).

eTable 2. Nonsusceptibility Counts and Rates Over Time by Patient Category and Antibiotic Category

| Patient category | Drug category             | 2009            | 2010            | 2011            | 2012            | 2013             | 2014            | 2015            | 2016            | 2017            |
|------------------|---------------------------|-----------------|-----------------|-----------------|-----------------|------------------|-----------------|-----------------|-----------------|-----------------|
| Overall          | Ampicillin                | 35/51<br>(68.6) | 47/69<br>(68.1) | 66/99<br>(66.7) | 58/89<br>(65.2) | 68/102<br>(66.7) | 56/84<br>(66.7) | 59/88<br>(67.0) | 50/79<br>(63.3) | 40/59<br>(67.8) |
|                  | Aminoglycosides           | 9/51 (17.6)     | 16/69<br>(23.2) | 21/99<br>(21.1) | 17/89<br>(19.1) | 13/102<br>(12.8) | 9/84<br>(10.7)  | 12/88<br>(13.6) | 10/78<br>(12.8) | 12/59<br>(20.2) |
|                  | ESBL                      | 3/50 (6.0)      | 0/67 (0)        | 4/96 (4.2)      | 1/86 (1.2)      | 11/99 (11.1)     | 4/84 (4.8)      | 2/84 (2.4)      | 4/78 (5.1)      | 5/51 (9.8)      |
|                  | Carbapenems               | 0/48 (0)        | 0/65 (0)        | 0/89 (0)        | 0/77 (0)        | 0/95 (0)         | 0/83 (0)        | 0/79 (0)        | 0/76 (0)        | 0/50 (0)        |
| Blood and CSF    | Ampicillin                | 23/34<br>(67.7) | 26/37<br>(70.3) | 31/43<br>(72.1) | 37/57<br>(64.9) | 38/55 (69.1)     | 30/36<br>(83.3) | 37/50 (74)      | 31/49<br>(63.3) | 29/37<br>(78.4) |
|                  | Aminoglycosides           | 7/34 (20.6)     | 7/37 (18.9)     | 10/43<br>(23.3) | 10/57<br>(17.5) | 9/55 (16.4)      | 4/36<br>(11.1)  | 8/50 (16)       | 4/48 (8.3)      | 8/37 (21.6)     |
|                  | ESBL                      | 2/34 (5.9)      | 0/36 (0)        | 3/43 (7.0)      | 1/54 (11.3)     | 6/53 (11.3)      | 0/36 (0)        | 1/49 (2)        | 3/49 (6.1)      | 3/31 (9.7)      |
|                  | Carbapenems               | 0/33 (0)        | 0/35 (0)        | 0/40 (0)        | 0/50 (0)        | 0/51 (0)         | 0/35 (0)        | 0/47 (0)        | 0/46 (0)        | 0/32 (0)        |
| Urine            | Ampicillin                | 12/18<br>(66.7) | 22/34<br>(64.7) | 39/61<br>(63.9) | 25/38<br>(65.8) | 31/48 (64.6)     | 29/51<br>(56.9) | 24/40 (60)      | 23/34<br>(67.7) | 12/23<br>(52.2) |
|                  | Aminoglycosides           | 2/18 (11.1)     | 9/34 (26.5)     | 14/61<br>(23.0) | 9/38 (23.7)     | 4/48 (8.3)       | 5/51 (9.8)      | 5/40 (12.5)     | 7/34 (20.6)     | 5/23 (21.7)     |
|                  | ESBL                      | 1/17 (5.9)      | 0/33 (0)        | 1/58 (1.7)      | 0/38 (0)        | 5/47 (10.6)      | 4/52 (7.7)      | 1/36 (2.8)      | 2/33 (6.1)      | 2/21 (9.5)      |
|                  | Carbapenems               | 0/16 (0)        | 0/32 (0)        | 0/54 (0)        | 0/32 (0)        | 0/45 (0)         | 0/52 (0)        | 0/34 (0)        | 0/34 (0)        | 0/19 (0)        |
| BW <1,500 g      | Ampicillin                | 21/30 (70)      | 32/47<br>(68.1) | 41/64<br>(64.1) | 35/52<br>(67.3) | 44/63 (69.8)     | 32/50<br>(64)   | 37/53<br>(69.8) | 29/44<br>(65.9) | 24/34<br>(70.6) |
|                  | Aminoglycosides           | 8/30 (26.7)     | 12/47<br>(25.5) | 17/64<br>(26.6) | 12/52<br>(23.1) | 11/63 (17.5)     | 9/50 (18)       | 10/53<br>(18.9) | 8/43 (18.6)     | 6/34 (17.7)     |
|                  | ESBL                      | 3/29 (10.3)     | 0/46 (0)        | 2/63 (3.2)      | 0/49 (0)        | 10/62 (16.1)     | 3/50 (6)        | 1/50 (2)        | 1/43 (2.3)      | 4/30 (13.3)     |
|                  | Carbapenems               | 0/28 (0)        | 0/44 (0)        | 0/57 (0)        | 0/46 (0)        | 0/58 (0)         | 0/50 (0)        | 0/48 (0)        | 0/41 (0)        | 0/29 (0)        |
| BW ≥1,500 g      | Ampicillin                | 14/21<br>(66.7) | 15/22<br>(68.2) | 25/35<br>(71.4) | 24/37<br>(64.9) | 24/39 (61.5)     | 24/34<br>(70.6) | 22/35<br>(62.9) | 21/35 (60)      | 16/25 (64)      |
|                  | Aminoglycosides           | 1/21 (4.8)      | 4/22 (18.2)     | 4/35 (11.4)     | 5/37 (13.5)     | 2/39 (5.1)       | 0/34 (0)        | 2/35 (5.7)      | 2/35 (5.7)      | 6/25 (24)       |
|                  | ESBL                      | 0/21 (0)        | 0/21 (0)        | 2/33 (6.1)      | 1/37 (2.7)      | 1/37 (2.7)       | 1/34 (2.9)      | 1/34 (2.9)      | 3/35 (8.6)      | 1/21 (4.8)      |
|                  | Carbapenems               | 0/20 (0)        | 0/21 (0)        | 0/32 (0)        | 0/31 (0)        | 0/37 (0)         | 0/33 (0)        | 0/31 (0)        | 0/35 (0)        | 0/21 (0)        |
| EOS              | Ampicillin                | 12/20<br>(71.4) | 10/14<br>(71.4) | 12/19<br>(63.2) | 19/28<br>(67.9) | 17/32 (53.1)     | 19/21<br>(90.5) | 27/34<br>(79.4) | 14/25 (56)      | 20/26<br>(76.9) |
|                  | Aminoglycosides           | 1/20 (5)        | 1/14 (7.14)     | 1/19 (5.3)      | 3/28 (10.7)     | 3/32 (9.4)       | 2/21 (9.5)      | 4/34 (11.8)     | 3/25 (12)       | 5/26 (19.2)     |
|                  | ESBL                      | 0/20 (0)        | 0/13 (0)        | 1/19 (5.3)      | 0/26 (0)        | 3/31 (9.7)       | 0/21 (0)        | 1/35 (2.9)      | 1/25 (4)        | 1/21 (4.8)      |
|                  | Carbapenems               | 0/20 (0)        | 0/12 (0)        | 0/18 (0)        | 0/24 (0)        | 0/30 (0)         | 0/21 (0)        | 0/32 (0)        | 0/23 (0)        | 0/23 (0)        |
|                  | Ampicillin and gentamicin | 1/20 (5)        | 1/14 (7.1)      | 1/19 (5.3)      | 3/28 (10.7)     | 3/32 (9.4)       | 2/21 (9.5)      | 4/35 (11.4)     | 3/25 (12)       | 4/26 (15.4)     |

|     |                 |                 |                 |                 |                 |              |                 |                 |            |            |
|-----|-----------------|-----------------|-----------------|-----------------|-----------------|--------------|-----------------|-----------------|------------|------------|
| LOS | Ampicillin      | 14/21<br>(66.7) | 15/22<br>(68.2) | 25/35<br>(71.4) | 24/37<br>(64.9) | 24/39 (61.5) | 24/34<br>(70.6) | 22/35<br>(62.9) | 21/35 (60) | 16/25 (64) |
|     | Aminoglycosides | 1/21 (4.8)      | 4/22 (18.2)     | 4/35 (11.4)     | 5/37 (13.5)     | 2/39 (5.1)   | 0/34 (0)        | 2/35 (5.7)      | 2/35 (5.7) | 6/25 (24)  |
|     | ESBL            | 0/21 (0)        | 0/21 (0)        | 2/33 (6.1)      | 1/37 (2.7)      | 1/37 (2.7)   | 1/34 (2.9)      | 1/34 (2.9)      | 3/35 (8.6) | 1/21 (4.8) |
|     | Carbapenems     | 0/20 (0)        | 0/21 (0)        | 0/32 (0)        | 0/31 (0)        | 0/37 (0)     | 0/33 (0)        | 0/31 (0)        | 0/35 (0)   | 0/21 (0)   |

Footnotes: Nonsusceptibility counts and rates by year, antibiotic category, and by patient category (specimen source, grouping infants as either blood/CSF culture positive or urine culture positive; birth weight status, grouping infants as either <1,500 grams or ≥1,500 grams and by timing of infection, grouping infants as either EOS or LOS). Numerator includes nonsusceptible isolates, denominator includes isolates tested to the drug category, and rates are in parentheses. BW (birth weight); CSF (cerebrospinal fluid); EOS (early onset sepsis); ESBL (extended-spectrum β-lactamase); g (grams); LOS (late onset sepsis).

eTable 3. Estimated Yearly Change in Nonsusceptibility by Patient Category and Antibiotic Category

| Category      | Antibiotic(s)           | Yearly change (%) | Lower confidence limit (%) | Upper confidence limit (%) |
|---------------|-------------------------|-------------------|----------------------------|----------------------------|
| Overall       | Ampicillin              | -0.28             | -1.75                      | 1.18                       |
|               | Aminoglycoside          | -0.85             | -1.93                      | 0.23                       |
|               | ESBL                    | 0.46              | -0.18                      | 1.11                       |
|               | Carbapenem              | 0                 | --                         | --                         |
| Blood and CSF | Ampicillin              | 0.63              | -1.2                       | 2.46                       |
|               | Aminoglycoside          | -0.85             | -2.29                      | 0.6                        |
|               | ESBL                    | 0.28              | -0.57                      | 1.13                       |
|               | Carbapenem              | 0                 | --                         | --                         |
| Urine         | Ampicillin              | -0.98             | -3.24                      | 1.27                       |
|               | Aminoglycoside          | -0.72             | -2.36                      | 0.91                       |
|               | ESBL                    | 0.79              | -0.02                      | 1.6                        |
|               | Carbapenem              | 0                 | --                         | --                         |
| BW <1,500g    | Ampicillin              | 0.23              | -1.65                      | 2.11                       |
|               | Aminoglycoside          | -1.44             | -3.04                      | 0.15                       |
|               | ESBL                    | 0.23              | -0.7                       | 1.17                       |
|               | Carbapenem              | 0                 | --                         | --                         |
| BW ≥1,500g    | Ampicillin              | -0.76             | -3.08                      | 1.56                       |
|               | Aminoglycoside          | 0.01              | -1.24                      | 1.26                       |
|               | ESBL                    | 0.78              | -0.34                      | 1.89                       |
|               | Carbapenem              | 0                 | --                         | --                         |
| EOS           | Ampicillin              | 1.44              | -1.05                      | 3.93                       |
|               | Aminoglycoside          | 1.33              | -0.15                      | 2.81                       |
|               | ESBL                    | 0.62              | -0.67                      | 1.91                       |
|               | Carbapenem              | 0                 | --                         | --                         |
|               | Ampicillin + Gentamicin | 1.11              | -0.4                       | 2.62                       |
| LOS           | Ampicillin              | -1.1              | -2.89                      | 0.69                       |
|               | Aminoglycoside          | -1.53             | -2.88                      | -0.18                      |
|               | ESBL                    | 0.5               | -0.29                      | 1.3                        |
|               | Carbapenem              | 0                 | --                         | --                         |

Footnotes: Yearly change estimates by antibiotic category and patient category (overall; specimen source, grouping infants as either blood/CSF culture positive or urine culture positive; birth weight status, grouping infants as either <1,500 grams or ≥1,500 grams and by timing of infection, grouping infants as either EOS or LOS). To estimate the average absolute change per year in the proportion of nonsusceptibility in each category and its confidence interval, generalized linear models were used to model nonsusceptibility (yes/no) as a function of year. BW (birth weight); CI (confidence interval); CSF (cerebrospinal fluid); EOS (early onset sepsis); ESBL (extended-spectrum  $\beta$ -lactamase); g (grams); LOS (late onset sepsis).

eTable 4. Multivariable Regression of Isolate Antibiotic Susceptibility Profile and In-Hospital Mortality

| Comparison     | aOR  | 95% CI     |
|----------------|------|------------|
| Group 1 vs 2   | 0.98 | 0.33, 2.91 |
| Group 1 vs 3   | 0.55 | 0.13, 2.37 |
| Group 2 vs 3   | 0.56 | 0.15, 2.13 |
| Group 1 vs 2+3 | 0.87 | 0.31, 2.47 |
| Group 1+2 vs 3 | 0.56 | 0.15, 1.99 |

Footnotes: All analyses adjusted for birth weight, sex and teaching hospital status. There were no isolates susceptible to ampicillin and nonsusceptible to gentamicin. aOR (adjusted odds ratio); CI (confidence interval).

Group 1: Ampicillin and gentamicin susceptible (n=69)

Group 2: Ampicillin nonsusceptible and gentamicin susceptible (n=127)

Group 3: Ampicillin and gentamicin nonsusceptible (n=22)

eFigure. Neonatal *Escherichia coli* Nonsusceptibility Trends Over Time by Specimen Source, Birth Weight Category, and Timing of Infection

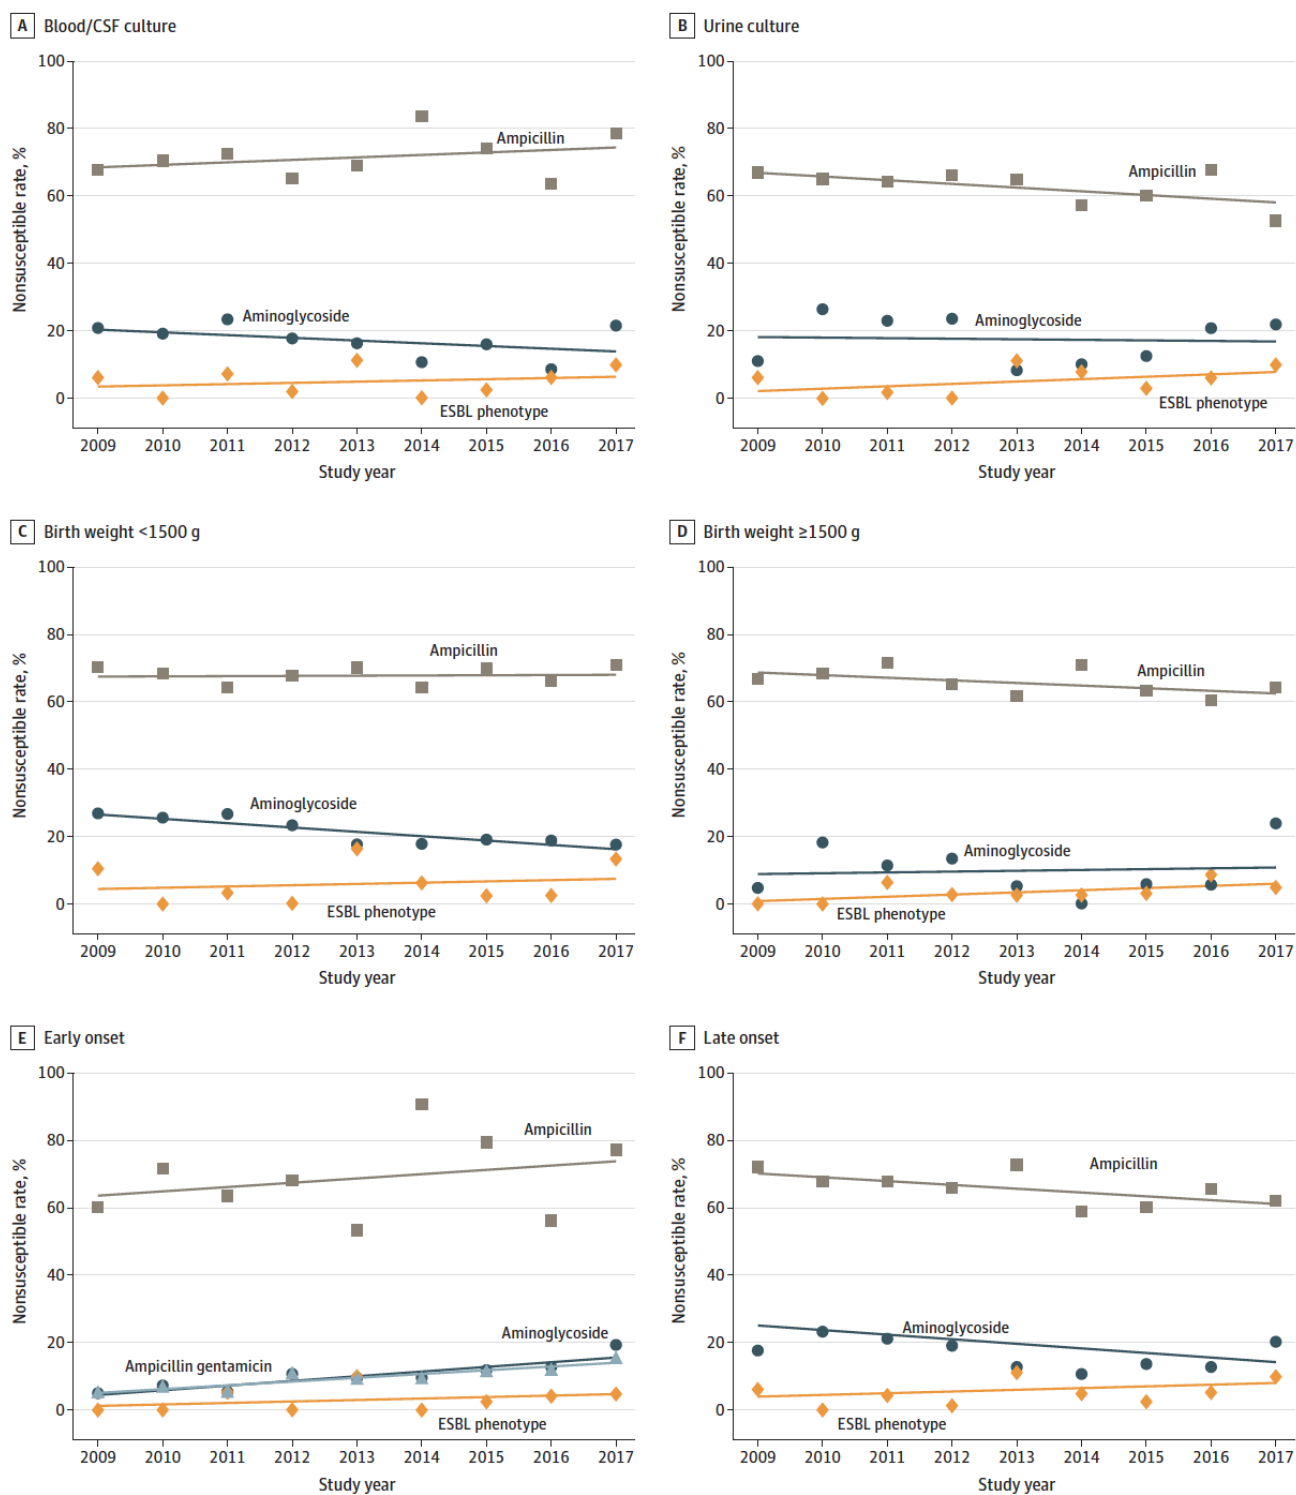

The eFigure shows the nonsusceptibility trends by specimen source, grouping infants as either (a) blood/CSF culture positive or (b) urine culture positive; birth weight status, grouping infants as either (c) <1500 g or (d)  $\geq$ 1500 g and by timing of infection, grouping infants as either (e) early onset sepsis or (f) late onset sepsis. Nonsusceptibility counts and rates for each patient group and antibiotic category by year are shown in eTable 2 in the Supplement. CSF (cerebrospinal fluid); ESBL (extended-spectrum  $\beta$ -lactamase).
